# Supplementary material
Source: publisher site journal article supplement (https://www.dovepress.com/article/431825)
Supplement: Supplementary file 1 [file get_supplementary_file.php]

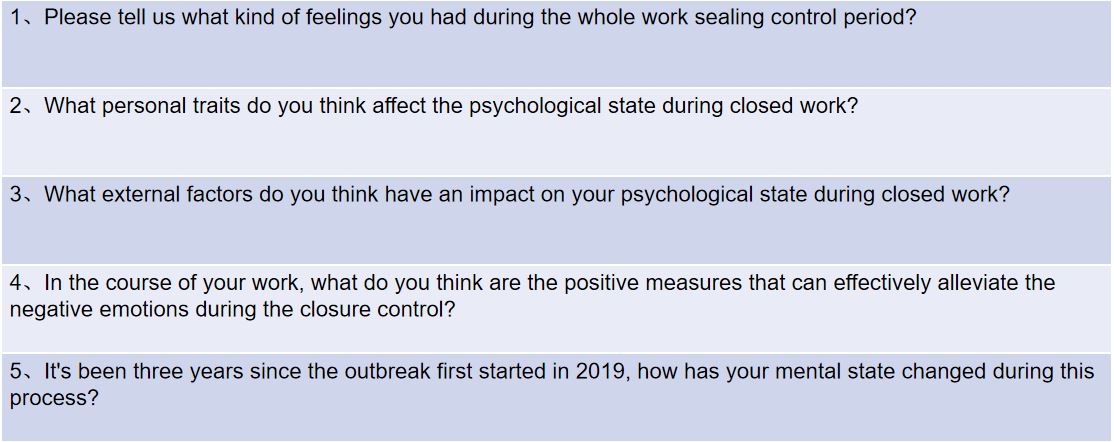


Supplementary Figure 1. The interview topic guide.

Supplementary Table 1.Consolidated criteria for reporting qualitative studies (COREQ): 32-item checklist

| No Item | Guide questions/description | Answers |
| --- | --- | --- |
| **Domain 1: Research team and reflexivity** | | |
| Personal Characteristics | | |
| 1. Interviewer/facilitator | Which author/s conducted the interview or focus group? | Xi Yang and Zhao Yin |
| 2. Credentials | What were the researcher’s credentials? E.g. PhD, MD | Xi Yang , MS; Zhao Yin, MS. |
| 3. Occupation | What was their occupation at the time of the study? | Hospital pharmacist |
| 4. Gender | Was the researcher male or female? | Female (Xi Yang) and Male (Zhao Yin) |
| 5. Experience and training | What experience or training did the researcher have? | Theoretical training and experience of conducting several qualitative studies with other groups. |
| Relationship with participants | | |
| 6. Relationship established | Was a relationship established prior to study commencement? | Yes |
| 7. Participant knowledge of the  interviewer | What did the participants know about the researcher? e.g. personal goals, reasons for doing the research | Reasons for doing the research |
| 8. Interviewer characteristics | What characteristics were reported about the interviewer/facilitator? e.g. Bias, assumptions, reasons and interests in the research topic | Reasons and interests in the research topic |
| **Domain 2: study design** | | |
| Theoretical framework | | |
| 9. Methodological orientation and Theory | What methodological orientation was stated to underpin the study? e.g. grounded theory, discourse analysis, ethnography, phenomenology, content analysis | Phenomenology. |
| Participant selection | | |
| 10. Sampling | How were participants selected? e.g. purposive, convenience, consecutive, snowball | Purposive |
| 11. Method of approach | How were participants approached? e.g. face-to-face, telephone, mail, email | Face-to-face interview |
| 12. Sample size | How many participants were in the study? | 30 |
| 13. Non-participation | How many people refused to participate or dropped out? Reasons? | No one refused and dropped out. |
| Setting | | |
| 14. Setting of data collection | Where was the data collected? e.g. home, clinic, workplace | Workplace. |
| 15. Presence of non-participants | Was anyone else present besides the participants and researchers? | No |
| 16. Description of sample | What are the important characteristics of the sample? e.g. demographic data, date | Yes, demographic data. |
| Data collection | | |
| 17. Interview guide | Were questions, prompts, guides provided by the authors? Was it pilot tested? | Yes |
| 18. Repeat interviews | Were repeat interviews carried out? If yes, how many? | No |
| 19. Audio/visual | Did the research use audio or visual recording to collect the data? | Audio recording |
| 20. Field notes | Were field notes made during and/or after the interview or focus group? | Yes |
| 21. Duration | What was the duration of the interviews or focus group? | 50-70 min |
| 22. Data saturation | Was data saturation discussed? | Yes |
| 23. Transcripts returned | Were transcripts returned to participants for comment and/or correction? | Yes |
| **Domain 3: analysis and findings** | | |
| Data analysis | | |
| 24. Number of data coders | How many data coders coded the data? | Two |
| 25. Description of the coding tree | Did authors provide a description of the coding tree? | No |
| 26. Derivation of themes | Were themes identified in advance or derived from the data? | Derived from the data |
| 27. Software | What software, if applicable, was used to manage the data? | NVIVO 12 |
| 28. Participant checking | Did participants provide feedback on the findings? | Yes |
| Reporting | | |
| 29. Quotations presented | Were participant quotations presented to illustrate the themes / findings? Was each quotation identified? e.g. participant number | Yes |
| 30. Data and findings consistent | Was there consistency between the data presented and the findings? | Yes |
| 31. Clarity of major themes | Were major themes clearly presented in the findings? | Yes |
| 32. Clarity of minor themes | Is there a description of diverse cases or discussion of minor themes? | Yes |

**Notes:** Adapted from Tong A, Sainsbury P, Consolidated criteria for reporting qualitative research (COREQ): a 32-item checklist for interviews and focus groups, International Journal for Quality in Health Care, 2007, vol 19, issue 6, pages 349–357, by permission of Oxford University Press.27


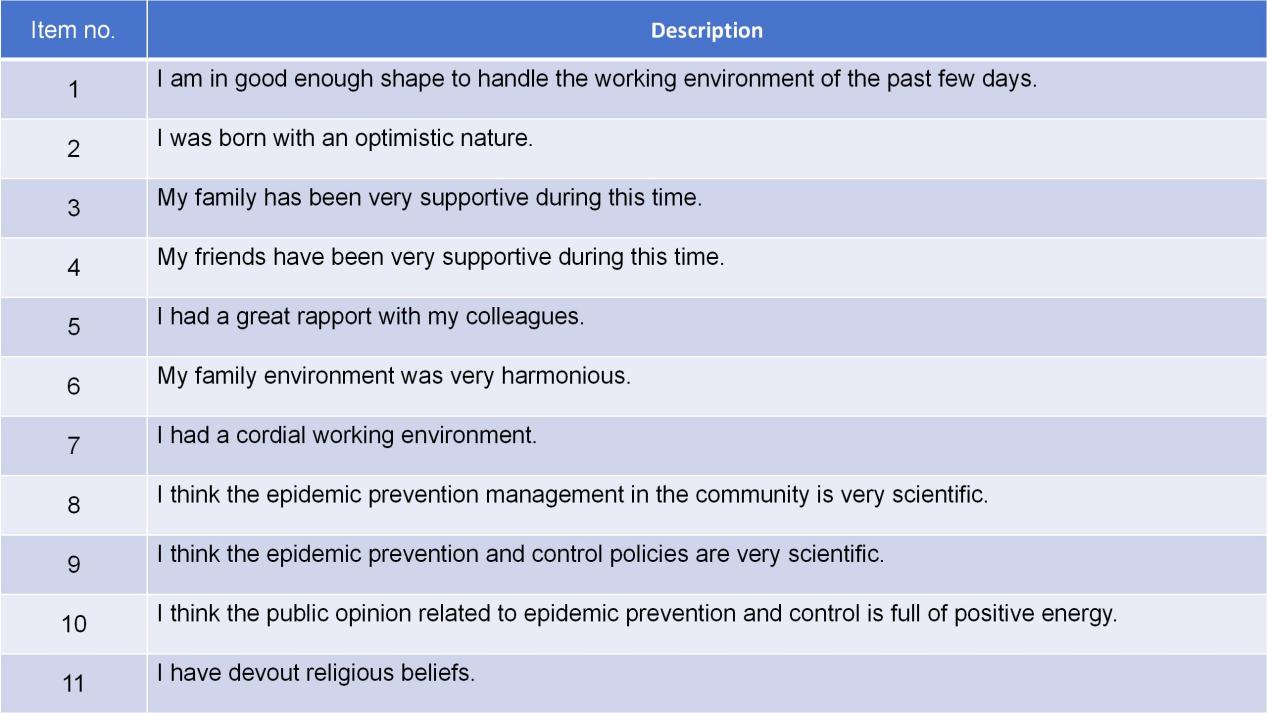


Supplementary Figure 2. 11 self-imposed questions. All of which carry a 5-point range of responses, as follows: totally disagree (1), disagree (2), generally agree (3), agree (4), and totally agree (5).

Supplementary Figure 3a. Generalized Anxiety Disorder grade among study participants (n=146).

Supplementary Figure 3b. Psychological Resilience Grade among study participants (n=146).

Supplementary Table 2. The results of self-designed questions in the network questionnaire

| Self-designed questions | Totally agree | agree | Generally agree | Disagree | Totally disagree | Totally agree and agree(%) | Disagree and totally disagree(%) | average | Coefficient of variation |
| --- | --- | --- | --- | --- | --- | --- | --- | --- | --- |
| Q1 | 57 | 53 | 25 | 8 | 3 | 75.34 | 7.53 | 4.05 | 0.24 |
| Q2 | 38 | 48 | 46 | 11 | 3 | 58.90 | 9.59 | 3.73 | 0.27 |
| Q3 | 77 | 49 | 19 | 0 | 1 | 86.30 | 0.68 | 4.38 | 0.17 |
| Q4 | 70 | 56 | 17 | 2 | 1 | 86.30 | 2.05 | 4.32 | 0.18 |
| Q5 | 67 | 63 | 15 | 1 | 0 | 89.04 | 0.68 | 4.34 | 0.16 |
| Q6 | 69 | 53 | 22 | 2 | 0 | 83.56 | 1.37 | 4.29 | 0.18 |
| Q7 | 58 | 51 | 32 | 4 | 1 | 74.66 | 3.42 | 4.10 | 0.22 |
| Q8 | 25 | 31 | 56 | 15 | 19 | 38.36 | 23.29 | 3.19 | 0.38 |
| Q9 | 24 | 34 | 59 | 14 | 15 | 39.73 | 19.86 | 3.26 | 0.35 |
| Q10 | 18 | 26 | 46 | 34 | 22 | 30.14 | 38.36 | 2.89 | 0.42 |
| Q11 | 7 | 12 | 27 | 31 | 69 | 13.01 | 68.49 | 2.02 | 0.59 |

Q1: I am in good enough shape to handle the working environment of the past few day; Q2: I was born with an optimistic nature; Q3: My family has been very supportive during this time; Q4: My friends have been very supportive during this time; Q5: I had a great rapport with my colleagues; Q6: My family environment was very harmonious; Q7: I had a cordial working environment; Q8: I think the epidemic prevention management in the community is very scientific; Q9:I think the epidemic prevention and control policies are very scientific; Q10: I think the public opinion related to epidemic prevention and control is full of positive energy; Q11: I have devout religious beliefs.
